# Supplementary material for: Thermal and Mechanical Characterization of EMA-TEGDMA Mixtures for Cosmetic Applications
Source: Preprints.org preprint supplement (doi:10.20944/preprints201801.0163.v1), 2018-01-17
Supplement: Supplementary file 3 [file supplementary]

**Supplementary material**

(**b**)

(**a**)

(**c**)

(**d**)

(**e**)

**Figure S1.** Dynamic DSC curves related to the evolution of the residual heat for A formulation after different curing times at 25°C: (**a**) 30 minutes, (**b**) 60 minutes, (**c**) 90 minutes, (**d**) 180 minutes and (**e**) 300 minutes.

(**f**)

(**e**)

(**d**)

(**c**)

(**b**)

(**a**)

**Figure S2.** Dynamic DSC curves related to the residual heat observed after curing overnight a sample from (**a**) A to (**f**) F formulations.

**Figure S3.** Dynamic TGA curves related to weight loss for final materials prepared from A to F formulations.

**Figure S4.** Dynamic TGA curves related to weight loss derivative for final materials prepared from A to F formulations.

**Figure S5.** tan delta and storage modulus comparison for each cured material prepared from A, B and C formulations with 1% DMT.

**Figure S6.** tan delta and storage modulus comparison for each cured material prepared from D, E, and F formulations with 0.75% DMT.

**Figure S7.** Dynamic DSC curve of Tg determination for commercial powder (POW).


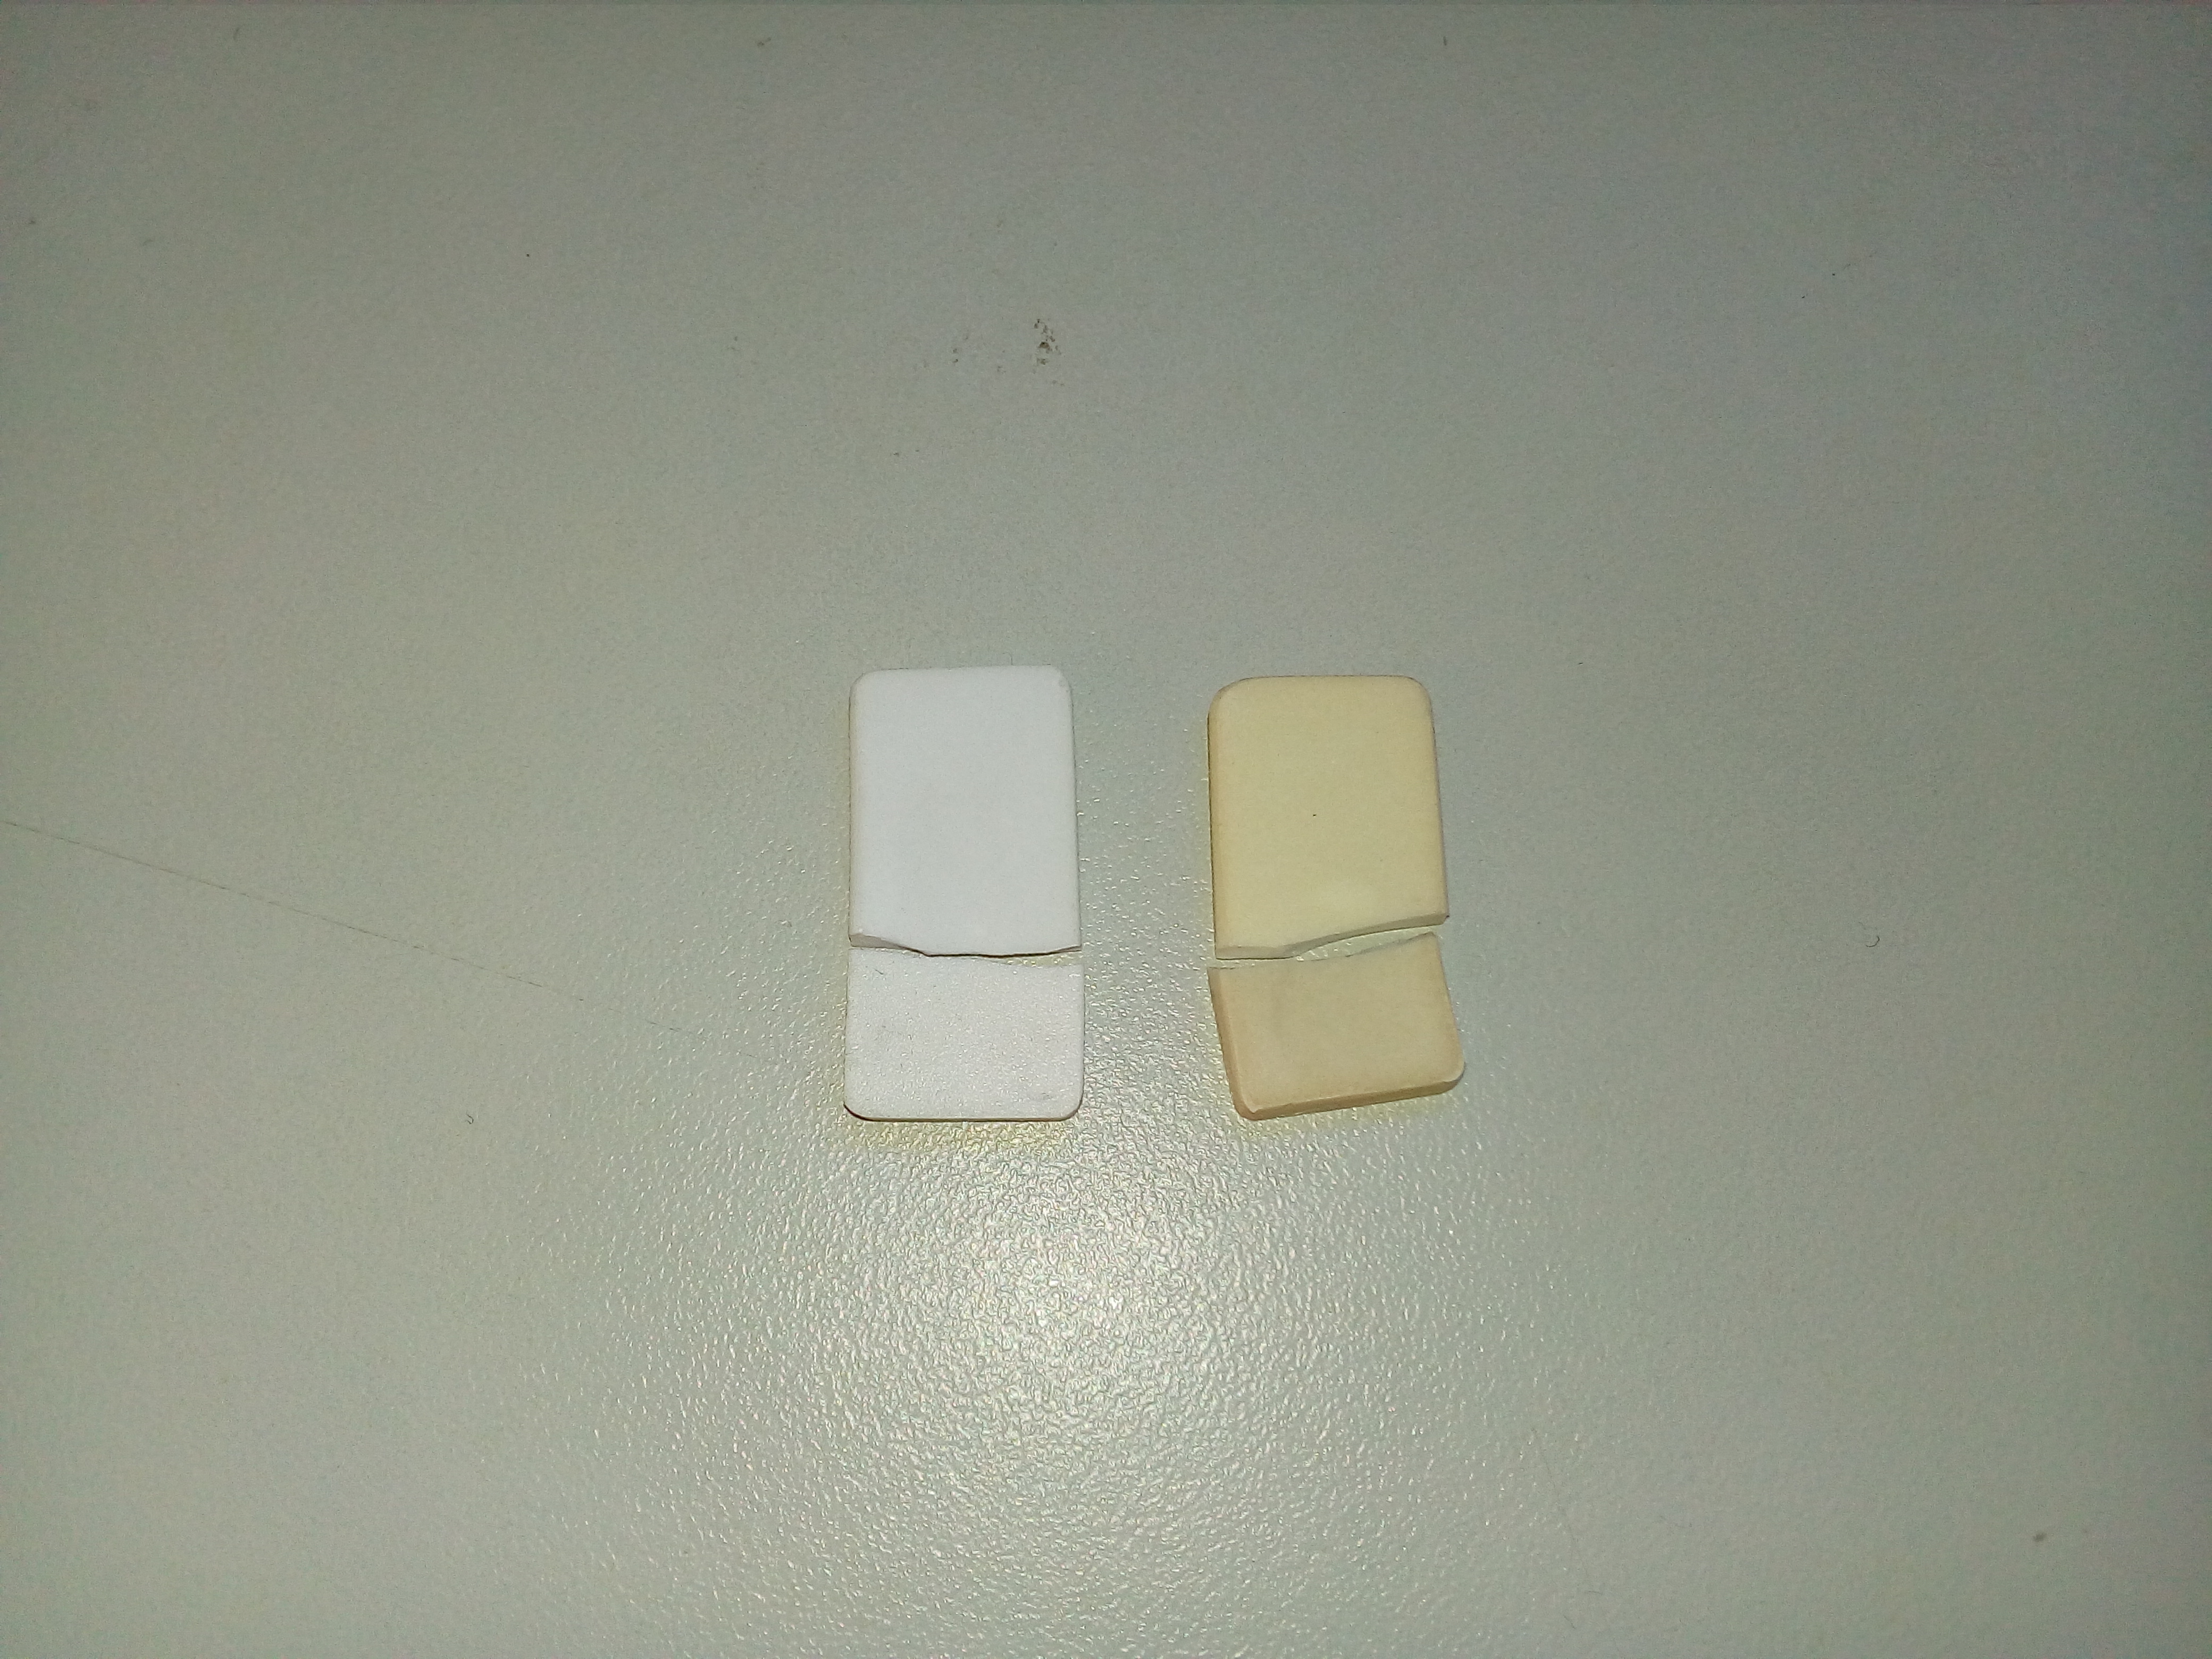


**Figure S8.** Pre-and post-aged samples of cured materials for impact tests.
